# Supplementary material for: Circadian Control of Mouse Heart Rate and Blood Pressure by the Suprachiasmatic Nuclei: Behavioral Effects Are More Significant than Direct Outputs
Source: PLOS journal article supplement (doi:10.1371/journal.pone.0009783), 2010-03-19
Supplement: S4 (10.1371/journal.pone.0009783.s004) [file journal.pone.0009783.s004]

**Table S2. Relative contributions of locomotor activity and the day/night cycle to variability in HR and BP**

|                          |           | WT         |            | <i>Vipr2</i> <sup>-/-</sup> |            |
|--------------------------|-----------|------------|------------|-----------------------------|------------|
|                          |           | BP         | HR         | BP                          | HR         |
| Light-dark cycle (LD)    | Activity  | 16.7 ± 1.0 | 20.5 ± 1.2 | 30.2 ± 1.3                  | 22.1 ± 1.2 |
|                          | Day/night | 15.1 ± 1.2 | 11.7 ± 1.4 | 4.6 ± 0.9                   | 0.6 ± 0.3  |
| Constant conditions (DD) | Activity  | 17.0 ± 1.1 | 13.5 ± 1.0 | 30.6 ± 1.4                  | 21.1 ± 1.2 |
|                          | Day/night | 14.8 ± 1.3 | 7.8 ± 1.0  | 4.8 ± 0.8                   | 3.4 ± 0.7  |

Percentage (mean ± SEM) of the total variance in HR and BP explained by locomotor activity and the day/night cycle, calculated using the squared correlation coefficient ( $R^2$ ) measure for explained variance.
